# Supplementary material for: Strong Photoluminescence Enhancement from Bilayer Molybdenum Disulfide via the Combination of UV Irradiation and Superacid Molecular Treatment
Source: MDPI journal article supplement (doi:10.3390/app11083530), 2021-04-15
Supplement: s1 [file s1]

**Supporting Information of**

**Strong Photoluminescence Enhancement from Bilayer Molybdenum Disulfide via the  
Combination of UV-irradiation and Superacid Molecular Treatment**

Yuki Yamada<sup>1</sup>, Takeshi Yoshimura<sup>1</sup>, Atsushi Ashida<sup>1</sup>, Norifumi Fujimura<sup>1</sup>, and Daisuke Kiriya<sup>1\*</sup>

<sup>1</sup> Department of Physics and Electronics, Osaka Prefecture University, 1-1 Gakuen-cho, Naka-ku, Sakai-shi, Osaka 599-8531, Japan

\*kiriya@pe.osakafu-u.ac.jp

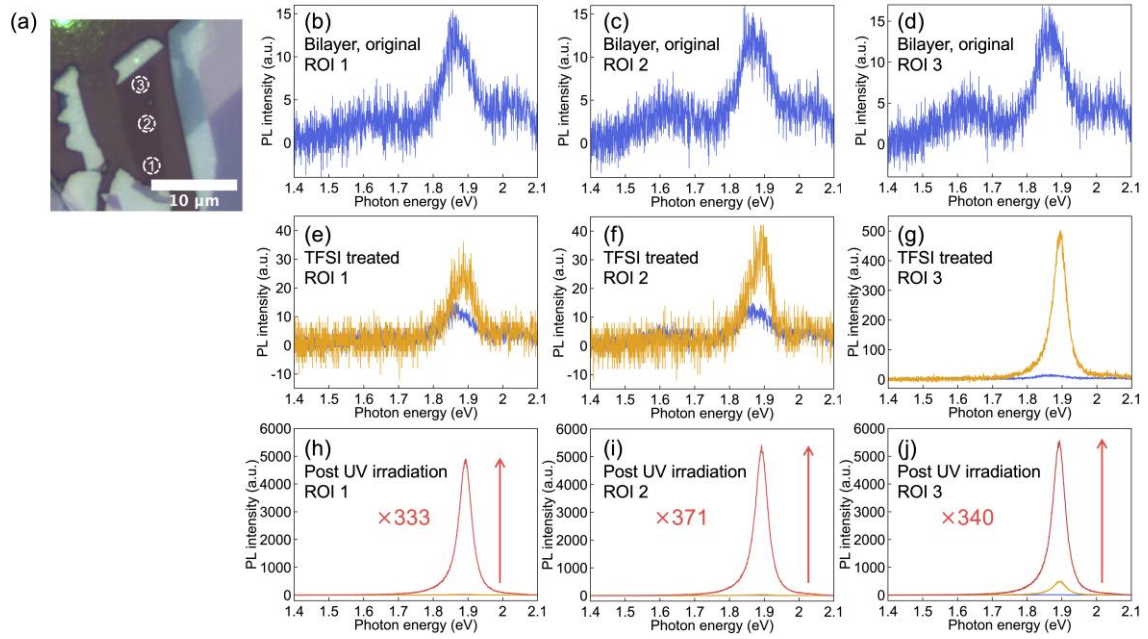

**Figure S1.** (a) Optical microscope image of the bilayer MoS<sub>2</sub> exfoliated with pressing the weight. The labels are the measurement regions (ROIs 1-3) in the plots shown in Figures S1b-j. (b-d) PL spectra for the as-exfoliated (original) bilayer MoS<sub>2</sub> in the region of ROI 1 (b), ROI 2 (c), and ROI 3 (d). (e-f) PL spectra for the TFSI-treated (orange) and the original bilayer MoS<sub>2</sub> for in the region of ROI 1 (e), ROI 2 (f), and ROI 3 (g). (h-j) PL spectra for the post-UV irradiated (red) and the TFSI-treated (orange) bilayer flake in the region of ROI 1 (h), ROI 2 (i), and ROI 3 (j). The values in Figures (h-j) are the magnitude of the PL enhancement of the post UV irradiated sample over the as-exfoliated (original) sample.

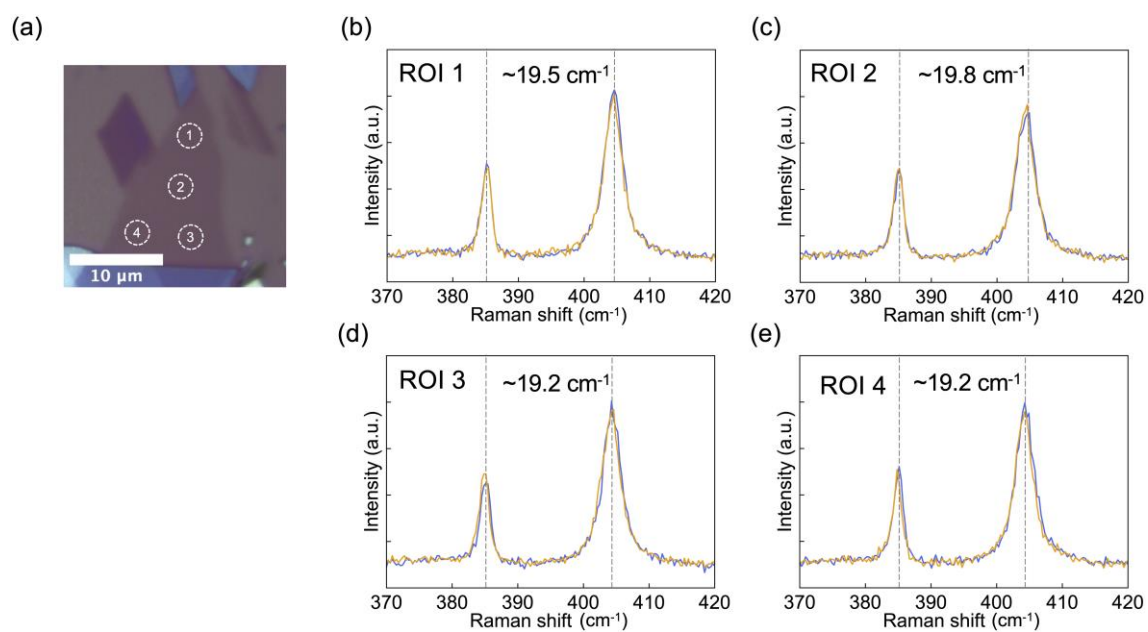

**Figure S2.** (a) Optical microscope image of the bilayer MoS<sub>2</sub> prepared with pressing the weight. The labels are the measurement regions (ROIs 1-4) in the plots shown in Figures S2b-e. (b-e) Raman spectra for as-exfoliated (original, blue) and the UV irradiated (orange) in ROI 1 (b), ROI 2 (c), ROI 3 (d), and ROI 4 (e).
