# Supplementary material for: Strong Photoluminescence Enhancement from Bilayer Molybdenum Disulfide via the Combination of UV Irradiation and Superacid Molecular Treatment
Source: MDPI journal article supplement (doi:10.3390/app11083530), 2021-04-15
Supplement: s1 [file s1]

Archive with 4 entries (4 files):
- applsci-1151898-supplementary.zip
- applsci-1151898-tex.zip
- applsci-1151898.pdf
- applsci-1151898.zip
