# Supplementary figures and images for: Strong Photoluminescence Enhancement from Bilayer Molybdenum Disulfide via the Combination of UV Irradiation and Superacid Molecular Treatment
Source: MDPI journal article supplement (doi:10.3390/app11083530), 2021-04-15

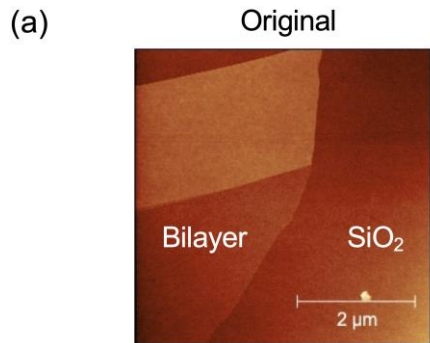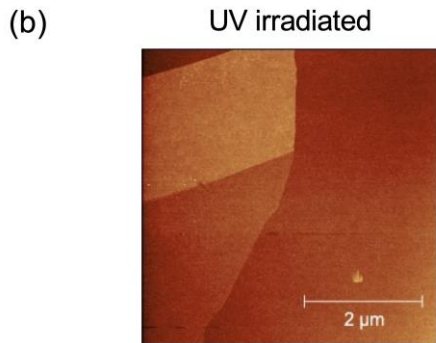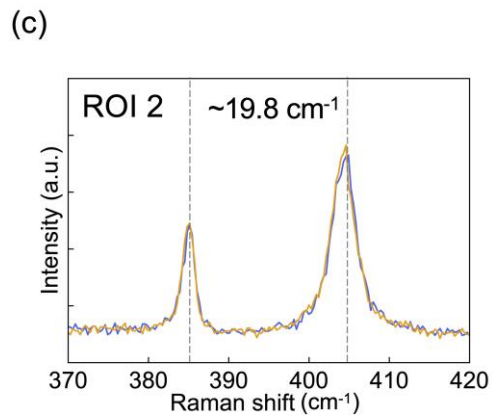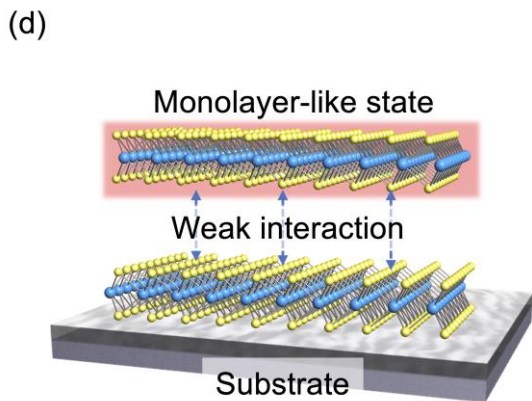

Supplement: s1 [file s1]

(a)

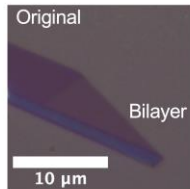

(b)

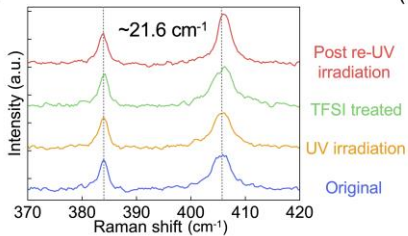

(c)

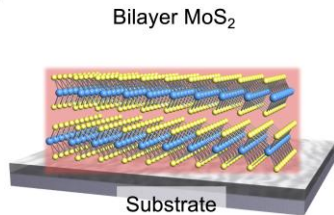

(d)

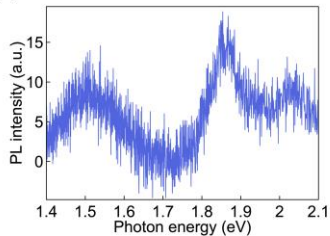

(e)

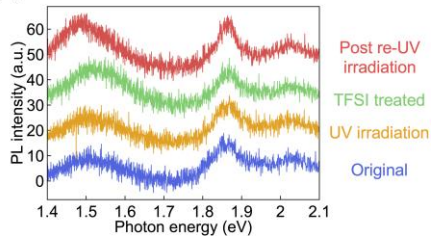

Supplement: s1 [file s1]

(a)

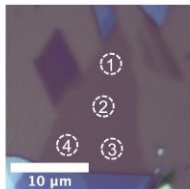

(b)

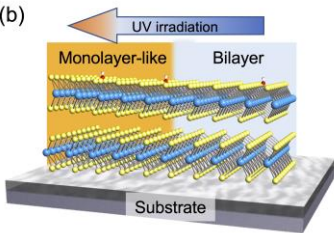

(c)

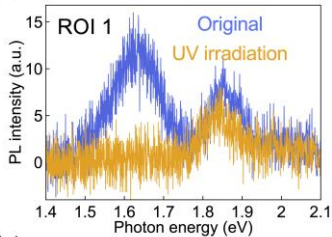

(d)

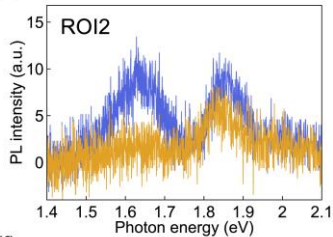

(e)

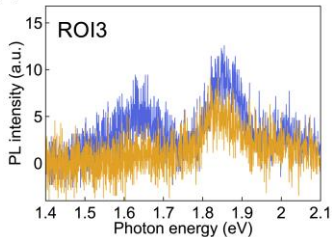

(f)

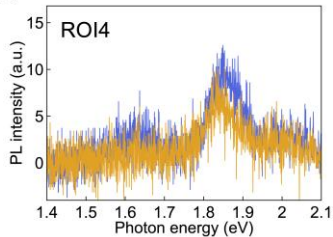

Supplement: s1 [file s1]

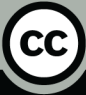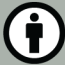

BY

Supplement: s1 [file s1]

(a)

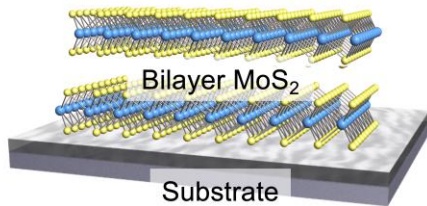

(b)

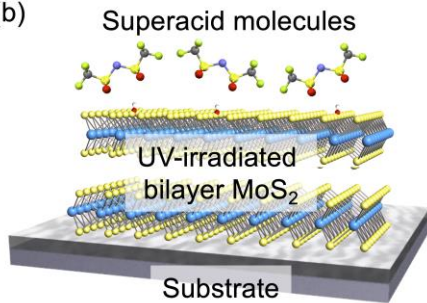

(c)

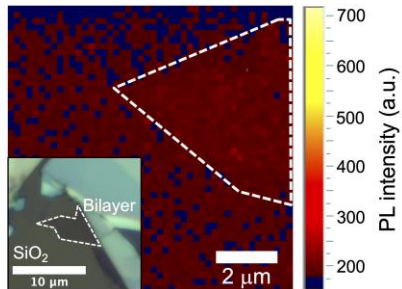

(d)

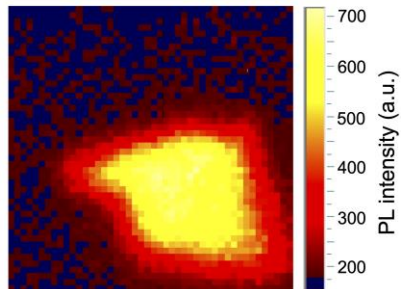

Supplement: s1 [file s1]

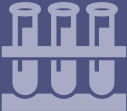

*applied  
sciences*

Supplement: s1 [file s1]

① UV irradiation

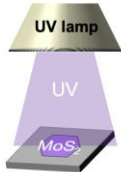

② Immersed in TFSI solution

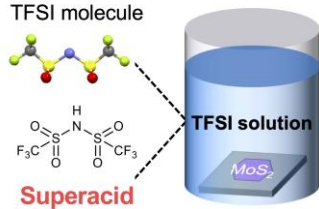

③ Post re-UV irradiation

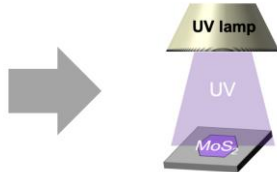

Supplement: s1 [file s1]

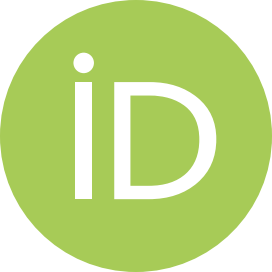

Supplement: s1 [file s1]

(a)

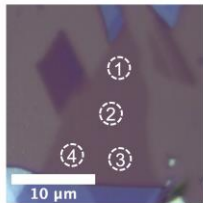

(b)

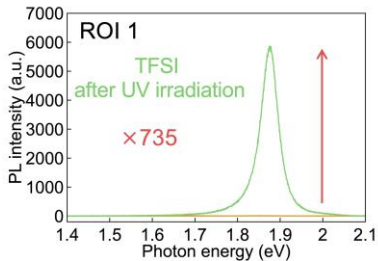

(c)

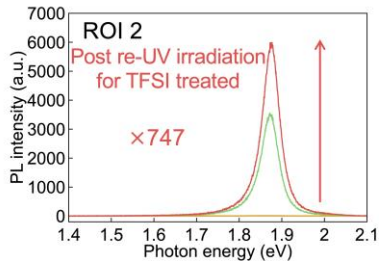

(d)

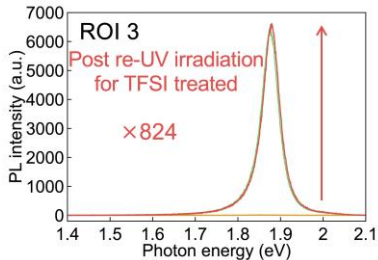

(e)

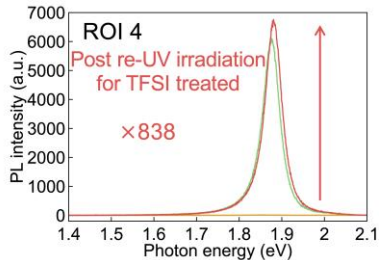

Supplement: s1 [file s1]
